# Supplementary material
Source: publisher figshare collection journal article supplement (https://karger.figshare.com/ndownloader/files/12454286)
Supplement: Supplementary file 1 [file 12454286]

**Supplemental Table S1. Summary of Demographic and Clinical Characteristics**

|  | **Full Group** | |  | | **PTSD** | |  | **Combat Control** | |
| --- | --- | --- | --- | --- | --- | --- | --- | --- | --- |
| **Measure** | ***N*** | **Mean (SD)** | |  | ***n*** | **Mean (SD)** |  | ***n*** | **Mean (SD)** |
| Demographics |  |  | |  |  |  |  |  |  |
| Age | 67 | 34.07 (9.38) | |  | 34 | 35.03 (9.26) |  | 33 | 34.50 (10.00) |
| WTAR IQ | 62 | 103.16 (8.60) | |  | 29 | 104.12 (7.45) |  | 33 | 101.97 (8.77) |
| Sex (Male) | 60 | ⎯ | |  | 29 | ⎯ |  | 31 | ⎯ |
| SUD/AUD | 59 | ⎯ | |  | 30 | ⎯ |  | 29 | ⎯ |
| Handedness (Right) | 57 | ⎯ | |  | 27 | ⎯ |  | 30 | ⎯ |
| Current Antidepressant | 22 | ⎯ | |  | 17 | ⎯ |  | 5 | ⎯ |
| Clinical Measures |  |  | |  |  |  |  |  |  |
| CES Total Score | 63 | 17.51 (9.88) | |  | 32 | 20.41 (10.84) |  | 31 | 14.52 (7.89) |
| BDI Total Score | 66 | 18.77 (12.02) | |  | 33 | 25.73 (10.32) |  | 33 | 10.69 (9.81) |
| CAPS Total Score | 67 | 43.76 (31.39) | |  | 34 | 69.79 (18.24) |  | 33 | 16.94 (15.08) |
| Head Motion: |  |  | |  |  |  |  |  |  |
| Average Translation | 67 | 0.571 (0.121) | |  | 34 | 0.576 (0.131) |  | 33 | 0.567 (0.112) |
| Average Rotation | 67 | 0.004 (0.001) | |  | 34 | 0.005 (0.001) |  | 33 | 0.005 (0.001) |
| Percent Bad Slices | 67 | 0.014 (0.095) | |  | 34 | 0.004 (0.014) |  | 33 | 0.024 (0.135) |
| Average Dropout Score | 67 | 1.029 (0.113) | |  | 34 | 1.043 (0.148) |  | 33 | 1.015 (0.059) |

**Abbreviations:** *p*, Pearson Chi-Square test of significant difference between PTSD/CC groups; WTAR, Wechsler Test of Adult Reading; SUD/AUD, Current Substance or Alcohol Use Disorder; CES, Combat Exposure Scale; BDI, Beck Depression Inventory 2nd Edition; CAPS, Clinician Administered PTSD Scale for DSM-IV.
